# Supplementary material for: Ethanol-Mediated Stress Promotes Autophagic Survival and Aggressiveness of Colon Cancer Cells via Activation of Nrf2/HO-1 Pathway
Source: PubMed Central journal article supplement (PMC6521343; doi:10.3390/cancers11040505), 2019-04-10

Supplementary Materials:

## Ethanol-Mediated Stress Promotes Autophagic Survival and Aggressiveness of Colon Cancer Cells Via Activation of Nrf2/HO-1 Pathway

Cesare Cernigliaro, Antonella D'Anneo, Daniela Carlisi, Michela Giuliano, Antonella Marino Gammazza, Rosario Barone, Lucia Longhitano, Francesco Cappello, Sonia Emanuele, Alfio Distefano, Claudia Campanella, Giuseppe Calvaruso, Marianna Lauricella

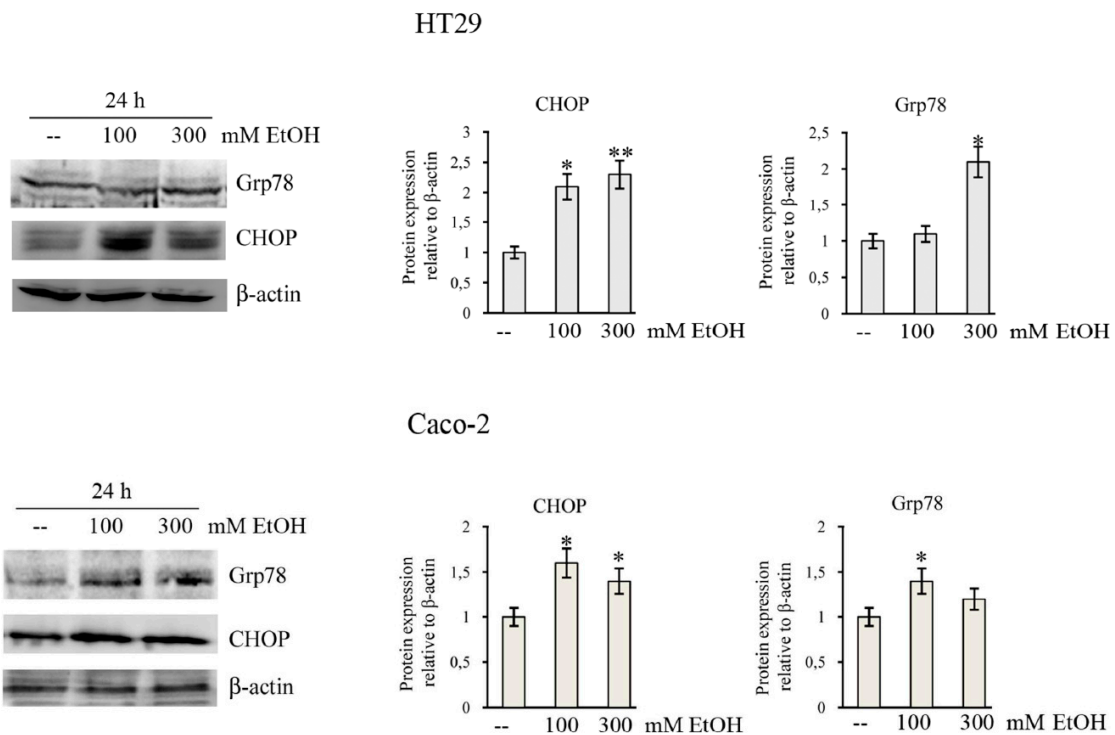

**Figure S1.** Ethanol induces ER stress in HT29 and Caco-2 colon cancer cells. Western blotting analysis of HOP and Grp78 in HT29 and Caco-2 cells treated for 24 h with 100 or 300 mM EtOH. The correct protein loading was ascertained by immunoblotting for  $\beta$ -actin. Representative blots of three independent experiments and densitometric analysis are shown. (\*)  $p < 0.05$  and (\*\*)  $p < 0.01$  compared to the untreated sample.

## HT29

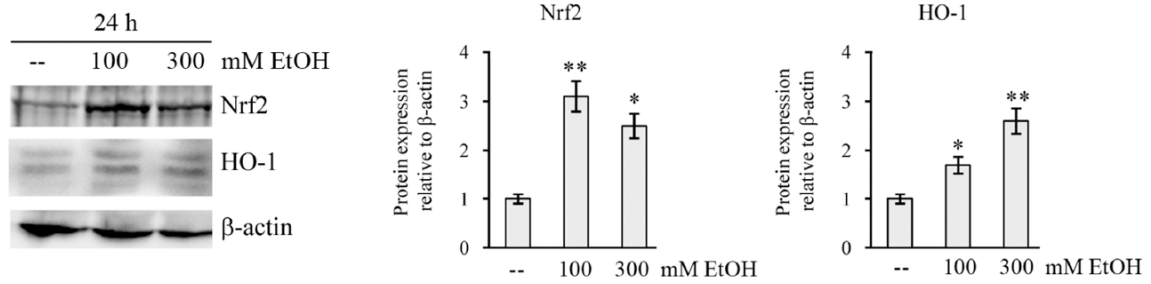

## Caco-2

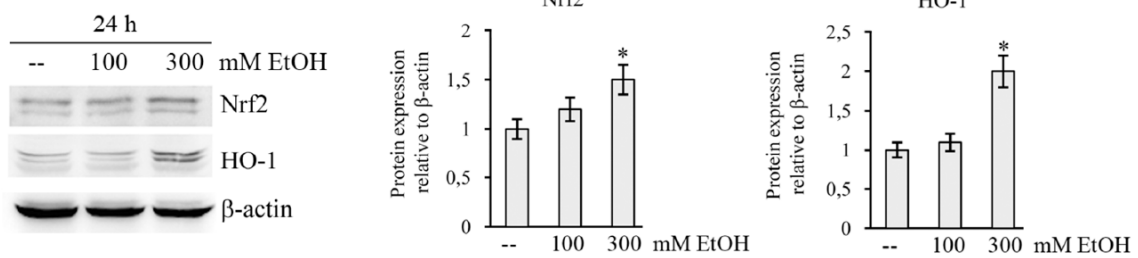

**Figure S2.** Effects of ethanol on Nrf2 and HO-1 in HT29 and Caco-2 colon cancer cells. Western blotting analysis of Nrf2 and HO-1 in HT29 and Caco-2 cells treated for 24 h with 100 or 300 mM EtOH. The correct protein loading was ascertained by immunoblotting for  $\beta$ -actin. Representative blots of three independent experiments and densitometric analysis are shown. (\*)  $p < 0.05$  and (\*\*)  $p < 0.01$  compared to the untreated sample.

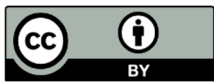

Supplement: cancers-11-00505-s001.pdf [file cancers-11-00505-s001.pdf]
